# Supplementary material for: Discovery of a highly selective VEGFR2 kinase inhibitor CHMFL-VEGFR2-002 as a novel anti-angiogenesis agent
Source: PubMed Central journal article supplement — Acta Pharm Sin B. 2019 Oct 18;10(3):488–97. doi: 10.1016/j.apsb.2019.10.004 (PMC7049616; doi:10.1016/j.apsb.2019.10.004), 2019-10-18
Supplement: mmc1.pdf [file mmc1.pdf]

## Supporting Information for

### Original article

## Discovery of a highly selective VEGFR2 kinase inhibitor CHMFL-VEGFR2-002 as a novel anti-angiogenesis agent

Zongru Jiang<sup>a,b,†</sup>, Li Wang<sup>a,b,†</sup>, Xuesong Liu<sup>a,b,†</sup>, Cheng Chen<sup>a,b,†</sup>, Beilei Wang<sup>a,b</sup>,  
Wenliang Wang<sup>a,b</sup>, Chen Hu<sup>a</sup>, Kailin Yu<sup>a</sup>, Ziping Qi<sup>a</sup>, Qingwang Liu<sup>c</sup>, Aoli Wang<sup>a</sup>,  
Jing Liu<sup>a,d</sup>, Guangchen Hong<sup>e,\*\*\*</sup>, Wenchao Wang<sup>a,d,\*\*</sup>, Qingsong Liu<sup>a,b,c,d,f,\*</sup>

<sup>a</sup>*High Magnetic Field Laboratory, Key Laboratory of High Magnetic Field and Ion Beam Physical Biology, Hefei Institutes of Physical Science, Chinese Academy of Sciences, Hefei 230031, Anhui, PR China*

<sup>b</sup>*University of Science and Technology of China, Hefei 230026, Anhui, PR China*

<sup>c</sup>*Precision Targeted Therapy Discovery Center, Institute of Technology Innovation, Hefei Institutes of Physical Science, Chinese Academy of Sciences, Hefei 230088, Anhui, PR China*

<sup>d</sup>*Precision Medicine Research Laboratory of Anhui Province, Hefei 230088, Anhui, PR China*

<sup>e</sup>*The People's Hospital of Shinan District, Qingdao 266002, Shandong, PR China*

<sup>f</sup>*Institutes of Physical Science and Information Technology, Anhui University, Hefei 230601, Anhui, PR China*

Received 7 May 2019; received in revised form 12 September 2019; accepted 12 October 2019

\*Corresponding author. Tel.: +86 551 65595161.

E-mail addresses: qslu97@hmfl.ac.cn (Qingsong Liu), wwbox@hmfl.ac.cn (Wenchao Wang), 2297023869@qq.com (Guangchen Hong).

†These authors made equal contributions to this work.

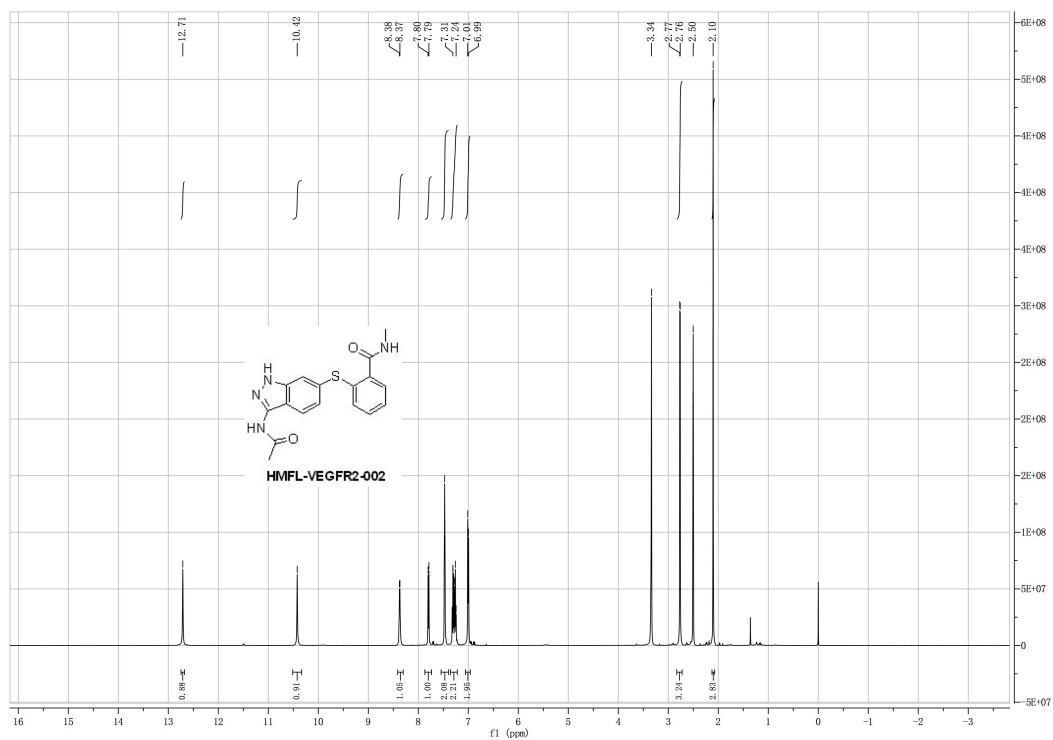

**Figure S1** The  $^1\text{H}$  NMR spectrum of CHMFL-VEGFR2-002.

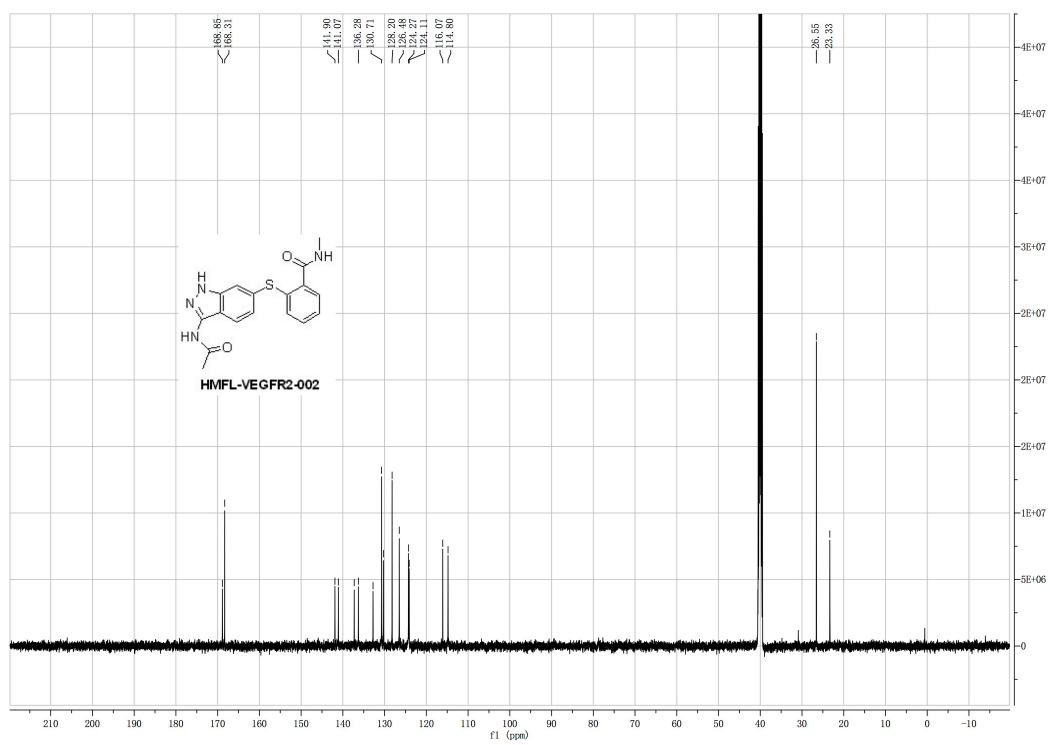

**Figure S2** The  $^{13}\text{C}$  NMR spectrum of CHMFL-VEGFR2-002.

**Data Filename** CHMFL-VEGFR2-002.d      **Sample Name** LXS  
**Sample Type** Sample      **Position** Vial 10  
**Instrument Name** Instrument 1      **User Name**  
**Acq Method** 01012018NORMAL.m      **Acquired Time** 5/8/2019 11:52:42 AM  
**IRM Calibration Status** Success      **DA Method** 3.m  
**Comment**

**Sample Group**      **Info.**  
**Acquisition SW** 6200 series TOF/6500 series  
**Version** Q-TOF B.05.00 (B5042.2)

### User Chromatograms

**Fragmentor Voltage** 175      **Collision Energy** 0      **Ionization Mode** ESI

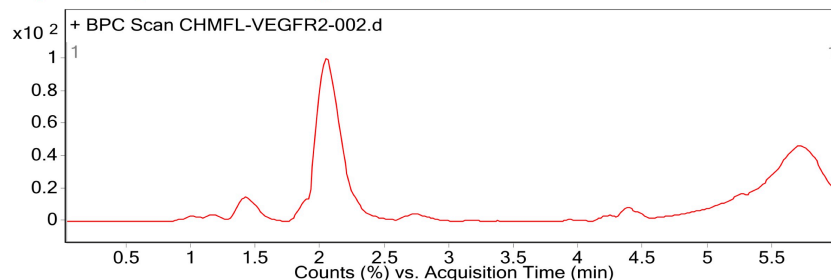

DAD1 - A: Signal A CHMFL-VEGFR2-002.d

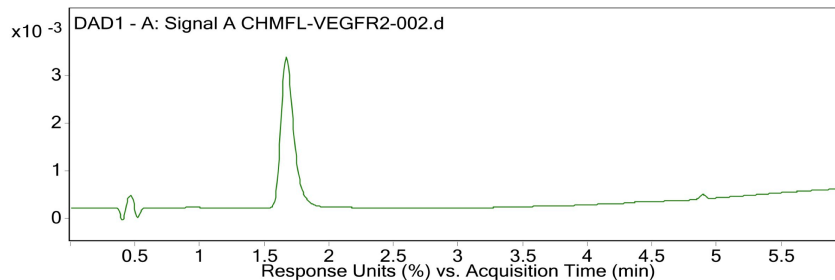

### User Spectra

**Fragmentor Voltage** 175      **Collision Energy** 0      **Ionization Mode** ESI

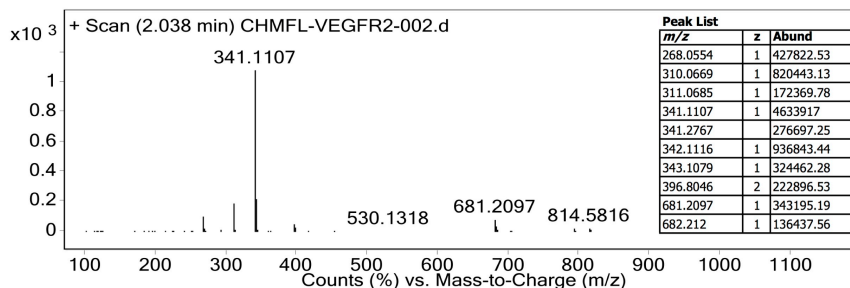

Figure S3 The LC-MS spectrum of CHMFL-VEGFR2-002.

**Table S1** Anti-proliferative activity (GI<sub>50</sub>) test in engineered BaF3 cells.

| Compound                    | Structure                                                                           | GI <sub>50</sub> (μmol/L) |                 |                 |                 |
|-----------------------------|-------------------------------------------------------------------------------------|---------------------------|-----------------|-----------------|-----------------|
|                             |                                                                                     | BaF3                      | TEL-VEGFR1-BaF3 | TEL-VEGFR2-BaF3 | TEL-VEGFR3-BaF3 |
| <b>1</b> (CHMFL-VEGFR2-002) | 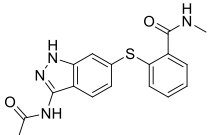   | > 10                      | > 10            | 0.15            | > 10            |
| <b>2</b>                    |    | > 10                      | 1.5             | 0.25            | 3.6             |
| <b>3</b>                    |   | 7.9                       | 1.3             | 0.39            | 2.6             |
| <b>4</b>                    |  | 3.05                      | 2.7             | 0.5             | 3.8             |
| <b>5</b>                    |  | 3.73                      | 1.1             | 0.2             | > 10            |
| <b>6</b>                    |  | 3.39                      | 2.29            | 0.19            | 2.89            |
| <b>7</b>                    |  | 2.99                      | 4.38            | 0.61            | 2.19            |
| <b>8</b>                    |  | 2.48                      | 1.02            | 0.38            | 3.19            |

|    |                                                                                     |      |      |      |      |
|----|-------------------------------------------------------------------------------------|------|------|------|------|
| 9  | 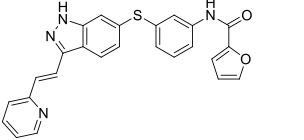   | 4.27 | 4.2  | 0.5  | 3.3  |
| 10 |    | > 10 | 0.36 | 0.15 | 0.96 |
| 11 |    | > 10 | 0.35 | 0.19 | 0.93 |
| 12 |    | > 10 | 0.3  | 0.33 | 2    |
| 13 |   | 7.4  | 0.5  | 0.12 | 1.2  |
| 14 |  | > 10 | 1    | 0.18 | 2    |
| 15 |  | > 10 | > 10 | 1.5  | > 10 |
| 16 |  | 0.59 | 0.55 | 0.19 | 0.67 |
| 17 |  | > 10 | 2.0  | 0.73 | 4.5  |
| 18 |  | > 10 | 1.1  | 0.75 | 2.9  |

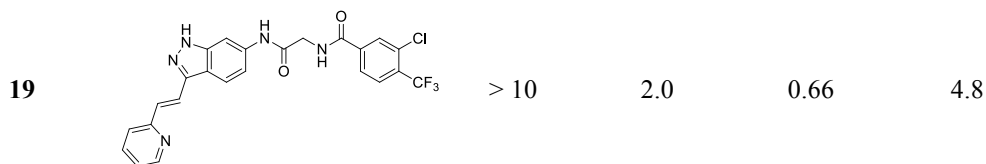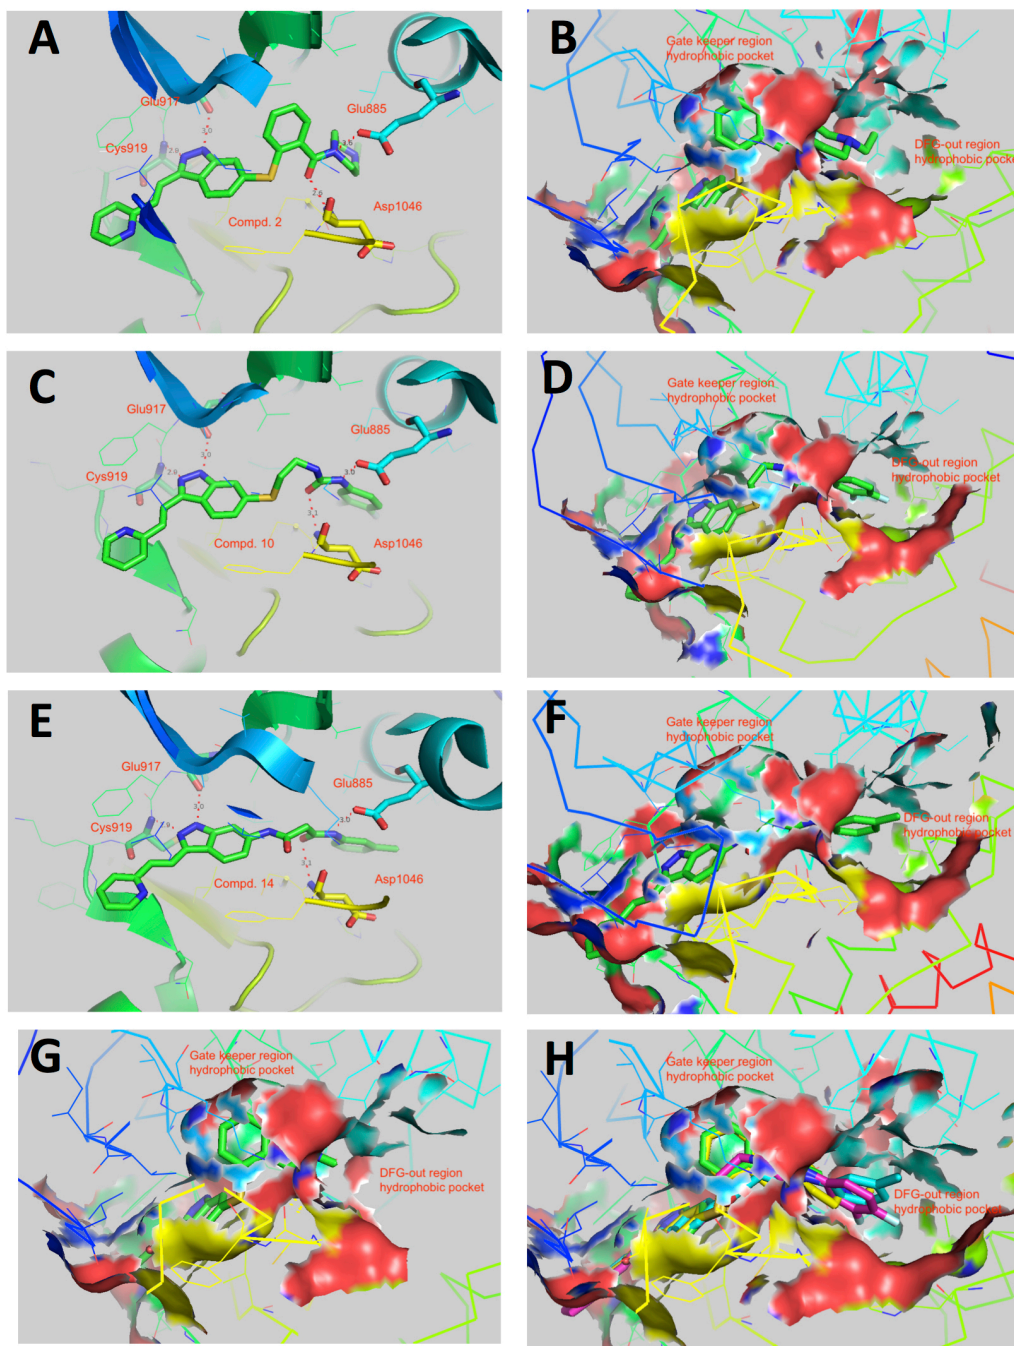

**Figure S4** Docking analysis of compounds **2**, **10**, **14** and CHMFL-VEGFR2-002. (A), (C) and (E) Cartoon mode illustration of compounds **2**, **10** and **14** in complex with

VEGFR2 kinase (PDB ID: 4AG8). (B), (D), (F) and (G) Solid surface illustration of two important hydrophobic pockets including the gate keeper region and the DFG-out region. (H) Overlapping of compounds **2**, **10**, **14** and CHMFL-VEGFR2-002 in the hydrophobic pocket with solid surface illustration mode.

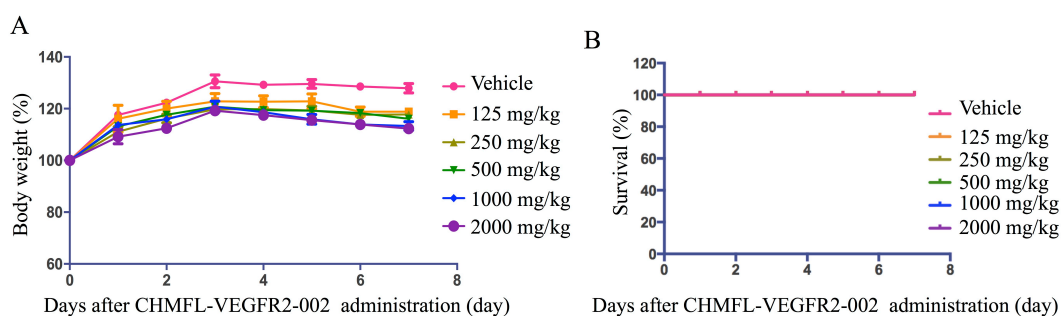

**Figure S5** Acute toxicity test of CHMFL-VEGFR2-002.

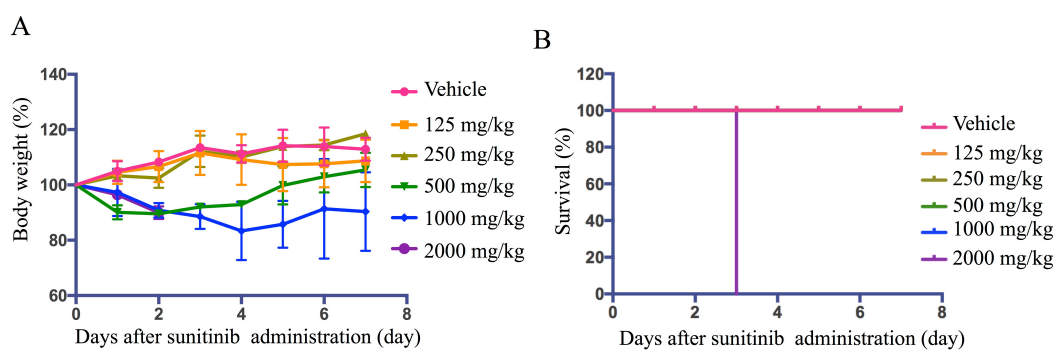

**Figure S6** Acute toxicity test of sunitinib.
